# Supplementary material for: Effects of plasma magnesium and prolactin on quantitative ultrasound measurements of heel bone among schizophrenic patients
Source: BMC Musculoskelet Disord. 2010 Feb 17;11:35. doi: 10.1186/1471-2474-11-35 (PMC2834603; doi:10.1186/1471-2474-11-35)
Supplement: Additional file 3 — Table S3. Comparison of present antipsychotic medication by serum prolactin, estradiol, testosterone, calcium, phosphate, magnesium, TSH, PTH, osteocalcin and NTX level in both genders by univariate analysis [file 1471-2474-11-35-S3.XLS]

## Sheet: Sheet1
Table 3 Comparison of present antipsychotic medication by serum prolactin, estradiol, testosterone, calcium, phosphate, magnesium, TSH, PTH, osteocalcin and NTX level in both genders by univariate analysis
Male	Odds Ratio*		Std. Err.		95% Conf. Interval					Odds Ratio*		Std. Err.		95% Conf. Interval
Prolactin (high vs. normal)	0.58		0.28		0.22	,	1.5		Prolactin (high vs. normal)	0.3		0.14		0.11	,	0.77
Estradiol (low vs. normal and high)	dropped								Estradiol (low vs. normal and high)	0.94		0.78		0.18	,	4.79
Testosterone (low vs. normal and high)	0.56		0.41		0.13	,	2.32		Testosterone (low vs. normal and high)	dropped
Calcium (low vs. high)	1.96		1.29		0.54	,	7.09		Calcium (low vs. high)	2.61		1.53		0.82	,	8.27
Phosphate (high vs. normal and low)	dropped								Phosphate (high vs. normal and low)	1.12		1.07		0.17	,	7.29
Magnesium (high vs. normal and low)	0.45		0.2		0.18	,	1.08		Magnesium (high vs. normal and low)	0.55		0.27		0.21	,	1.45
TSHa (low vs. high and normal)	dropped								TSH (low vs. high and normal)	4.73		6.02		0.39	,	57.24
PTHb (low vs. high and normal)	1.13		0.66		0.35	,	3.58		PTH (low vs. high and normal)	0.53		0.77		0.03	,	9.08
Osteocalcin (low vs. normal and high)	1.35		1.13		0.26	,	6.94		Osteocalcin (low vs. normal and high)	1.79		1.34		0.41	,	7.77
NTXc (high vs. low and normal)	dropped								NTX (high vs. low and normal)	0.96		0.94		0.14	,	6.51
a: TSH: Thyroid Hormone Stimulating Hormone
b. PTH: Parathyroid Hormone
c. NTX: Cross-linked N-teleopeptide of type I collagen
*: The odds ratio means the odds of atypical antipsychotics vs. the odds of atypical and combined antipsychotics
